# Supplementary material
Source: PubMed Central journal article supplement (PMC3322219)
Supplement: mmc1.pdf [file mmc1.pdf]

## Supplemental Data

### Exome Sequencing Identifies *PDE4D*

### Mutations as Another Cause of Acrodysostosis

Caroline Michot, Carine Le Goff, Alice Goldenberg, Avinash Abhyankar, Céline Klein, Esther Kinning, Anne-Marie Guerrot, Philippe Flahaut, Alice Duncombe, Genevieve Baujat, Stanislas Lyonnet, Caroline Thalassinos, Patrick Nitschke, Jean-Laurent Casanova, Martine Le Merrer, Arnold Munnich, and Valérie Cormier-Daire

Table S1. Filtering Procedure for Bioinformatics Analysis

| Number of Individuals | Total SNV | Variant in Neither dbSNP Nor 1,000 Genomes | Neither “In-House” Exome | Nonsynonymous SNP (Missense, Nonsense, Splicing, Deletion, Insertion) | Candidate Gene Involved in cAMP Pathway Signaling |
|-----------------------|-----------|--------------------------------------------|--------------------------|-----------------------------------------------------------------------|---------------------------------------------------|
| 1                     | 46,766    | 5,431                                      | 700                      | 204                                                                   | 2                                                 |
| 2                     | 18,083    | 1,958                                      | 334                      | 8                                                                     | 1                                                 |

Table S2. Genes in Which Novel Variants Were Identified by Exome Sequencing in Two Unrelated Individuals with Acrodysostosis

| Genes          | Individual 1 Variant | Individual 2 Variant |
|----------------|----------------------|----------------------|
| <i>CD101</i>   | p.Leu916Val          | p. Tyr61Ser          |
| <i>PEX19</i>   | p.Gln82Lys           | p.Gln82Lys           |
| <i>GOLGA6B</i> | p.His 618Gln         | Splicing             |
| <i>WNK4</i>    | p.Ser641Thr          | p.Ser1222Arg         |
| <i>FRYL</i>    | p.Glu1543Gly         | p.Lys1544Glu         |
| <i>PDE4D</i>   | p.Pro225Thr          | p.Phe226Ser          |
| <i>XPO7</i>    | insGG                | insGG                |
| <i>MUC5B</i>   | p.Ser4378Arg         | delC                 |
